# Supplementary material for: Sucrose and Mannans Affect Arabidopsis Shoot Gravitropism at the Cell Wall Level
Source: MDPI journal article supplement (doi:10.3390/plants13020209), 2024-01-11
Supplement: s1 [file s1]

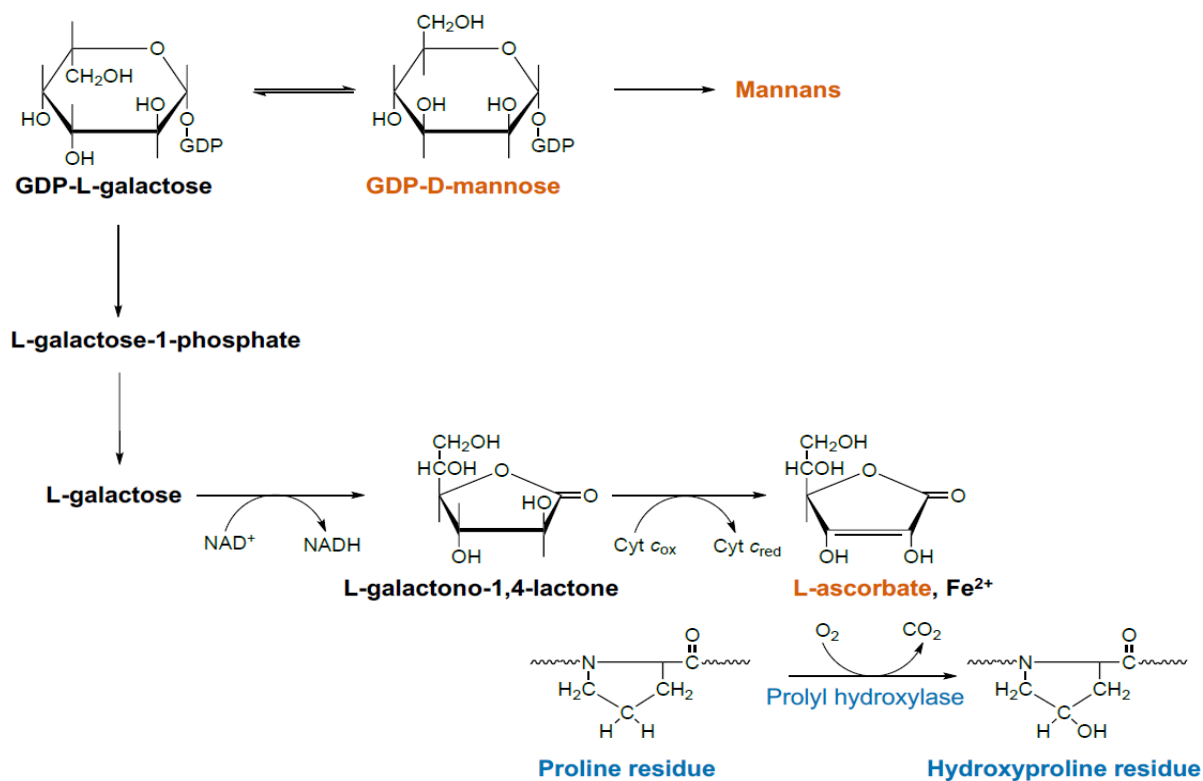

**Figure S3.** Biosynthesis pathways explain why the cell wall levels of mannans and extensins could be interdependent. GDP-D-mannose is a common biosynthetic precursor for mannans and ascorbate. Ascorbate is an essential cofactor of prolyl hydroxylase enzymes that posttranslationally hydroxylate proline residues of cell wall structural glycoproteins to yield hydroxyproline residues.
