# Supplementary material for: Sucrose and Mannans Affect Arabidopsis Shoot Gravitropism at the Cell Wall Level
Source: MDPI journal article supplement (doi:10.3390/plants13020209), 2024-01-11
Supplement: s1 [file s1]

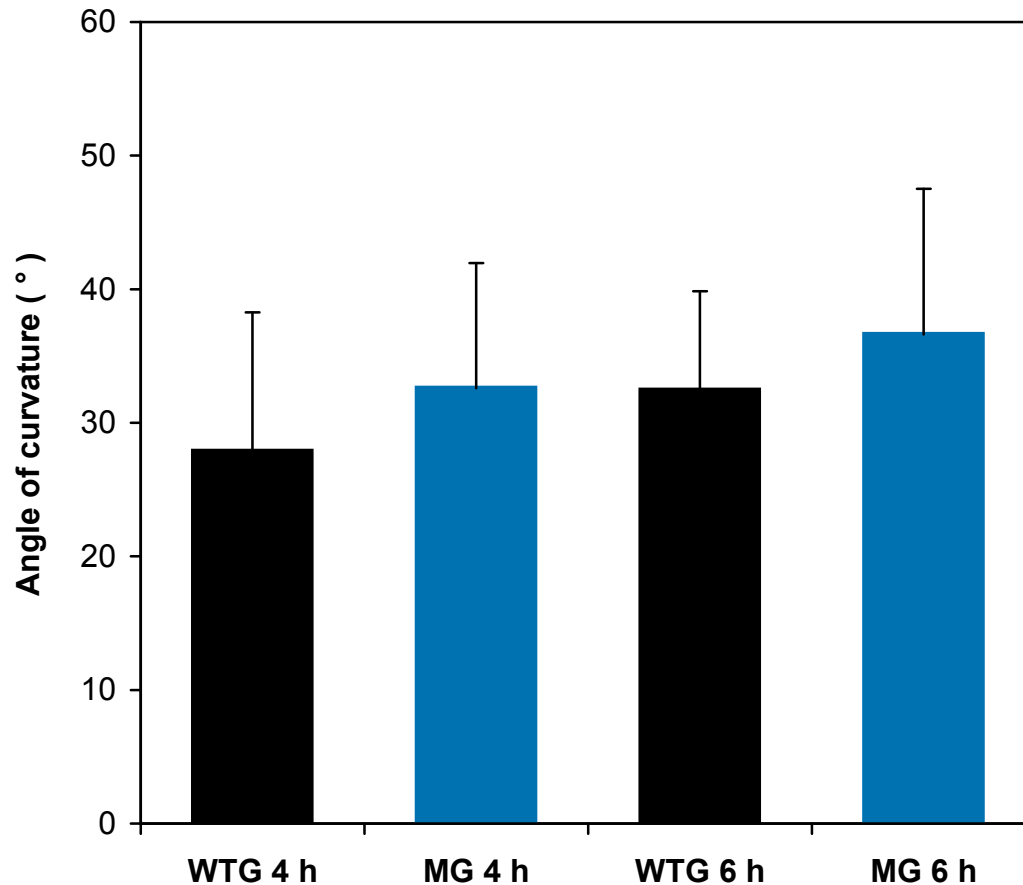

**Figure S2.** Mannan-deficient *cs/a2cs/a3cs/a9* triple mutants of *Arabidopsis* plants demonstrate increased gravitropic bending of hypocotyls. Three-day-old etiolated Col-0 and *cs/a2cs/a3cs/a9* seedlings grown on vertical Petri plates were gravistimulated by a 90° counterclockwise rotation of the plates. Angles of their hypocotyl curvature were measured 4 h and 6 h after the moment of gravistimulation. Abbreviations: WTG - gravistimulated Col-0 plants; MG - gravistimulated *cs/a2cs/a3cs/a9* triple mutant plants. Data are means  $\pm$  SD (n=45). The triple mutation significantly ( $P < 0.05$ , Student's *t*-test) increased the angle of hypocotyl bending 4 h and 6 h after gravistimulation.
