# Supplementary material for: Sucrose and Mannans Affect Arabidopsis Shoot Gravitropism at the Cell Wall Level
Source: MDPI journal article supplement (doi:10.3390/plants13020209), 2024-01-11
Supplement: s1 [file s1]

**Table S1.** Relative content of metabolites in hypocotyls of gravistimulated and nongravistimulated wild type Col-0 Arabidopsis seedlings, grown without sucrose (control) or in the presence of sucrose (1% w/v) in the growth medium. Results of three independent experiments (n=8). Data are given in arbitrary units.

Abbreviations:

C - nongravistimulated wild type Col-0 seedlings, grown without sucrose;

S - nongravistimulated wild type Col-0 seedlings, grown in the presence of sucrose (1% w/v);

CG - gravistimulated wild type Col-0 seedlings, grown without sucrose;

SG - gravistimulated wild type Col-0 seedlings, grown in the presence of sucrose (1% w/v).

Data are means, standard errors (SE) and *P* values of pairwise comparisons of the above variants using Student's *t*-test.

All metabolites for which significant differences between nongravistimulated and gravistimulated variants (C vs. CG and S vs. SG) were found are indicated in bold. In the case of a significant increase in the content of a metabolite in gravistimulated vs. nongravistimulated seedlings (CG vs. C and SG vs. S), as well as in seedlings grown in the presence of sucrose compared with those grown without sucrose (S vs. C and SG vs. CG) the respective *P* values are shown on a red background. In the case of a significant decrease in the content of a metabolite in the abovementioned comparisons the respective *P* values are shown on a blue background.

| Metabolite                      | C      | C, SE  | CG     | CG, SE | S       | S, SE | SG      | SG, SE | <i>P</i> value,<br>C/CG | <i>P</i> value,<br>C/S | <i>P</i> value,<br>CG/SG | <i>P</i> value,<br>S/SG |
|---------------------------------|--------|--------|--------|--------|---------|-------|---------|--------|-------------------------|------------------------|--------------------------|-------------------------|
| Alanine                         | 1.066  | 0.062  | 1.330  | 0.212  | 2.189   | 0.290 | 2.446   | 0.487  | 0.132                   | 0.004                  | 0.032                    | 0.330                   |
| <b>γ-Aminobutyric acid</b>      | 0.401  | 0.025  | 0.301  | 0.043  | 0.690   | 0.044 | 0.841   | 0.108  | 0.036                   | 0.000                  | 0.001                    | 0.114                   |
| Arabinose                       | 0.451  | 0.084  | 0.384  | 0.056  | 1.564   | 0.045 | 1.596   | 0.175  | 0.261                   | 0.000                  | 0.000                    | 0.432                   |
| <b>Arginine</b>                 | 0.620  | 0.035  | 0.490  | 0.042  | 0.209   | 0.028 | 0.236   | 0.041  | 0.017                   | 0.000                  | 0.000                    | 0.295                   |
| Ascorbic acid                   | 21.138 | 14.903 | 16.324 | 10.814 | 103.568 | 5.786 | 102.180 | 18.642 | 0.399                   | 0.000                  | 0.001                    | 0.472                   |
| Asparagine                      | 3.878  | 0.709  | 3.782  | 0.684  | 0.518   | 0.080 | 0.531   | 0.120  | 0.462                   | 0.002                  | 0.001                    | 0.467                   |
| <b>Asparagine, dehydro-</b>     | 1.021  | 0.104  | 0.622  | 0.116  | 0.167   | 0.014 | 0.175   | 0.027  | 0.012                   | 0.000                  | 0.003                    | 0.399                   |
| <b>Aspartic acid</b>            | 1.190  | 0.084  | 0.851  | 0.155  | 1.388   | 0.058 | 1.617   | 0.131  | 0.041                   | 0.040                  | 0.001                    | 0.071                   |
| N-acetylglucosamine             | 13.949 | 1.658  | 11.829 | 2.008  | 8.306   | 0.588 | 9.417   | 1.616  | 0.215                   | 0.007                  | 0.183                    | 0.267                   |
| N-acetylglucosamine 6-phosphate | 0.034  | 0.007  | 0.028  | 0.007  | 0.189   | 0.023 | 0.224   | 0.035  | 0.292                   | 0.000                  | 0.000                    | 0.209                   |
| Benzoic acid                    | 0.074  | 0.007  | 0.074  | 0.015  | 0.074   | 0.007 | 0.072   | 0.014  | 0.497                   | 0.488                  | 0.477                    | 0.459                   |
| β-Alanine                       | 0.758  | 0.055  | 0.645  | 0.094  | 0.639   | 0.034 | 0.742   | 0.115  | 0.162                   | 0.048                  | 0.263                    | 0.207                   |
| Valine                          | 2.683  | 0.252  | 2.131  | 0.355  | 0.327   | 0.014 | 0.346   | 0.063  | 0.114                   | 0.000                  | 0.001                    | 0.391                   |
| Galactosamine                   | 0.087  | 0.016  | 0.061  | 0.015  | 0.106   | 0.013 | 0.129   | 0.023  | 0.132                   | 0.190                  | 0.015                    | 0.205                   |
| <b>Galacturonic acid</b>        | 0.126  | 0.007  | 0.085  | 0.017  | 0.033   | 0.005 | 0.032   | 0.006  | 0.025                   | 0.000                  | 0.008                    | 0.450                   |
| Hydroxylamine                   | 0.364  | 0.082  | 0.257  | 0.057  | 0.245   | 0.050 | 0.266   | 0.067  | 0.154                   | 0.122                  | 0.460                    | 0.402                   |
| <b>Hydroxybutyric acid</b>      | 0.061  | 0.011  | 0.036  | 0.009  | 0.023   | 0.009 | 0.053   | 0.013  | 0.052                   | 0.010                  | 0.160                    | 0.043                   |
| Hydroxyproline                  | 0.149  | 0.020  | 0.109  | 0.017  | 0.112   | 0.006 | 0.320   | 0.242  | 0.078                   | 0.062                  | 0.206                    | 0.209                   |
| Glycolic acid                   | 0.080  | 0.005  | 0.062  | 0.010  | 0.093   | 0.005 | 0.119   | 0.019  | 0.085                   | 0.050                  | 0.011                    | 0.110                   |
| Glyceric acid                   | 2.871  | 0.616  | 2.764  | 0.676  | 5.229   | 0.453 | 5.610   | 0.733  | 0.454                   | 0.005                  | 0.006                    | 0.333                   |
| Glycerol                        | 1.295  | 0.449  | 0.665  | 0.248  | 0.404   | 0.089 | 0.493   | 0.114  | 0.124                   | 0.048                  | 0.271                    | 0.274                   |
| Glycerol-3-phosphate            | 0.084  | 0.016  | 0.070  | 0.012  | 0.067   | 0.006 | 0.068   | 0.012  | 0.236                   | 0.165                  | 0.458                    | 0.462                   |
| Glycine                         | 7.869  | 0.447  | 6.916  | 1.069  | 4.999   | 0.260 | 4.939   | 0.856  | 0.216                   | 0.000                  | 0.086                    | 0.474                   |
| Glutamine                       | 9.446  | 0.826  | 8.215  | 1.311  | 8.504   | 0.752 | 10.208  | 1.739  | 0.221                   | 0.208                  | 0.188                    | 0.195                   |
| Glutamine, dehydro-             | 2.065  | 0.428  | 1.175  | 0.245  | 2.364   | 0.250 | 2.570   | 0.325  | 0.051                   | 0.280                  | 0.002                    | 0.312                   |

| Metabolite          | C      | C, SE  | CG     | CG, SE | S       | S, SE  | SG      | SG, SE | P value,<br>C/CG | P value,<br>C/S | P value,<br>CG/SG | P value,<br>S/SG |
|---------------------|--------|--------|--------|--------|---------|--------|---------|--------|------------------|-----------------|-------------------|------------------|
| Glutamic acid       | 3.722  | 0.347  | 3.515  | 0.570  | 5.127   | 0.468  | 5.940   | 0.951  | 0.381            | 0.017           | 0.025             | 0.230            |
| Glucose             | 24.564 | 12.310 | 17.594 | 8.497  | 85.897  | 20.676 | 98.047  | 29.795 | 0.325            | 0.015           | 0.016             | 0.372            |
| Glucose-6-phosphate | 1.004  | 0.059  | 0.841  | 0.152  | 1.398   | 0.033  | 1.513   | 0.206  | 0.172            | 0.000           | 0.011             | 0.299            |
| Dihydrouracil       | 0.631  | 0.132  | 0.500  | 0.090  | 0.538   | 0.032  | 0.649   | 0.171  | 0.215            | 0.259           | 0.229             | 0.272            |
| Iditol              | 9.986  | 4.636  | 5.631  | 2.826  | 4.569   | 2.174  | 0.902   | 0.596  | 0.220            | 0.160           | 0.071             | 0.074            |
| Isoleucine          | 1.050  | 0.091  | 0.881  | 0.135  | 0.091   | 0.008  | 0.089   | 0.016  | 0.160            | 0.000           | 0.000             | 0.464            |
| Leucine             | 1.322  | 0.126  | 0.846  | 0.207  | 0.096   | 0.026  | 0.106   | 0.024  | 0.037            | 0.000           | 0.004             | 0.398            |
| Citric acid         | 1.142  | 0.250  | 0.853  | 0.203  | 1.485   | 0.158  | 1.685   | 0.213  | 0.193            | 0.137           | 0.007             | 0.232            |
| Malonic acid        | 0.117  | 0.010  | 0.094  | 0.017  | 0.071   | 0.006  | 0.063   | 0.004  | 0.129            | 0.001           | 0.055             | 0.164            |
| Maltose             | 0.160  | 0.008  | 0.123  | 0.021  | 0.063   | 0.005  | 0.068   | 0.010  | 0.064            | 0.000           | 0.020             | 0.338            |
| Mannose             | 5.282  | 2.917  | 3.655  | 1.777  | 34.520  | 2.011  | 43.534  | 7.509  | 0.322            | 0.000           | 0.000             | 0.140            |
| Melibiose           | 0.050  | 0.005  | 0.035  | 0.007  | 0.066   | 0.009  | 0.074   | 0.013  | 0.055            | 0.063           | 0.013             | 0.318            |
| Myo-inositol        | 14.222 | 0.911  | 12.079 | 1.840  | 22.073  | 0.703  | 26.235  | 5.366  | 0.160            | 0.000           | 0.018             | 0.233            |
| Lactic acid         | 0.301  | 0.101  | 0.246  | 0.073  | 0.211   | 0.022  | 0.381   | 0.153  | 0.333            | 0.206           | 0.223             | 0.154            |
| Urea                | 0.081  | 0.009  | 0.064  | 0.013  | 0.022   | 0.003  | 0.025   | 0.005  | 0.159            | 0.000           | 0.012             | 0.307            |
| 2-Oxoglutaric acid  | 0.021  | 0.004  | 0.016  | 0.003  | 0.018   | 0.003  | 0.022   | 0.003  | 0.189            | 0.290           | 0.091             | 0.168            |
| Oxoproline          | 9.276  | 0.589  | 7.709  | 1.326  | 11.211  | 0.323  | 12.038  | 1.237  | 0.153            | 0.009           | 0.016             | 0.268            |
| Ornithine           | 0.193  | 0.018  | 0.162  | 0.032  | 0.029   | 0.003  | 0.022   | 0.002  | 0.200            | 0.000           | 0.002             | 0.028            |
| Palmitic acid       | 2.327  | 0.437  | 1.722  | 0.277  | 1.991   | 0.198  | 2.084   | 0.547  | 0.134            | 0.251           | 0.284             | 0.438            |
| Pyrophosphoric acid | 23.635 | 2.382  | 18.239 | 3.867  | 16.855  | 2.069  | 18.517  | 2.653  | 0.129            | 0.027           | 0.477             | 0.315            |
| Proline             | 0.861  | 0.043  | 0.749  | 0.113  | 0.387   | 0.032  | 0.418   | 0.095  | 0.191            | 0.000           | 0.021             | 0.383            |
| Putrescine          | 2.732  | 0.235  | 2.121  | 0.382  | 2.190   | 0.274  | 2.597   | 0.508  | 0.100            | 0.080           | 0.234             | 0.248            |
| Ribose              | 3.247  | 0.997  | 2.479  | 0.778  | 0.927   | 0.025  | 1.016   | 0.143  | 0.278            | 0.029           | 0.052             | 0.278            |
| Sucrose             | 27.624 | 3.874  | 20.873 | 4.789  | 146.975 | 11.382 | 145.912 | 29.882 | 0.147            | 0.000           | 0.002             | 0.487            |
| Serine              | 3.414  | 0.241  | 2.781  | 0.415  | 2.361   | 0.065  | 2.974   | 0.452  | 0.107            | 0.002           | 0.378             | 0.110            |
| Sinapic acid        | 1.097  | 0.106  | 0.724  | 0.135  | 0.556   | 0.037  | 0.573   | 0.093  | 0.024            | 0.001           | 0.187             | 0.431            |
| Trehalose           | 10.100 | 2.408  | 7.737  | 2.515  | 11.010  | 1.274  | 10.093  | 0.856  | 0.255            | 0.373           | 0.200             | 0.281            |
| Threonine           | 2.384  | 0.184  | 1.899  | 0.272  | 1.252   | 0.078  | 1.416   | 0.209  | 0.083            | 0.000           | 0.091             | 0.240            |
| Tryptophan          | 1.517  | 0.160  | 1.229  | 0.234  | 0.245   | 0.016  | 0.240   | 0.028  | 0.165            | 0.000           | 0.002             | 0.437            |
| Phenylalanine       | 1.900  | 0.193  | 1.445  | 0.251  | 0.169   | 0.012  | 0.162   | 0.029  | 0.088            | 0.000           | 0.001             | 0.413            |
| Phosphoric acid     | 1.121  | 0.220  | 0.914  | 0.217  | 0.122   | 0.015  | 0.143   | 0.037  | 0.258            | 0.002           | 0.005             | 0.299            |
| Fructose            | 0.353  | 0.060  | 0.259  | 0.037  | 0.364   | 0.067  | 0.389   | 0.097  | 0.105            | 0.452           | 0.122             | 0.420            |
| Ethanolamine        | 0.596  | 0.204  | 0.336  | 0.067  | 0.696   | 0.154  | 0.808   | 0.130  | 0.132            | 0.351           | 0.004             | 0.294            |
| Malic acid          | 8.562  | 0.279  | 7.173  | 1.245  | 4.778   | 0.204  | 5.169   | 0.659  | 0.155            | 0.000           | 0.092             | 0.293            |
| Succinic acid       | 0.363  | 0.018  | 0.333  | 0.067  | 0.281   | 0.037  | 0.366   | 0.053  | 0.337            | 0.040           | 0.354             | 0.110            |
