# Supplementary material for: Sucrose and Mannans Affect Arabidopsis Shoot Gravitropism at the Cell Wall Level
Source: MDPI journal article supplement (doi:10.3390/plants13020209), 2024-01-11
Supplement: s1 [file s1]

**Table S2.** Relative content of metabolites in hypocotyls of gravistimulated and nongravistimulated wild type Col-0 and *cs/a2cs/a3cs/a9* Arabidopsis seedlings. Results of three independent experiments (n=8). Data are given in arbitrary units.

Abbreviations:  
WT - nongravistimulated wild type Col-0 seedlings;  
M - nongravistimulated *cs/a2cs/a3cs/a9* triple mutant seedlings;  
WTG - gravistimulated wild type Col-0 seedlings;  
MG - gravistimulated *cs/a2cs/a3cs/a9* triple mutant seedlings.  
Data are means, standard errors (SE) and *P* values of pairwise comparisons of the above variants using Student's *t*-test.  
All metabolites for which significant differences between nongravistimulated and gravistimulated variants (WT vs. WTG and M vs. MG) were found are indicated in bold. In the case of a significant increase in the content of a metabolite in gravistimulated vs. nongravistimulated seedlings (WTG vs. WT and MG vs. M), as well as in *cs/a2cs/a3cs/a9* triple mutant seedlings compared with wild type Col-0 seedlings (M vs. WT and MG vs. WTG) the respective *P* values are shown on a red background. In the case of a significant decrease in the content of a metabolite in the abovementioned comparisons the respective *P* values are shown on a blue background.

| Metabolite                            | WT    | WT, SE | WTG   | WTG,SE | M     | M, SE | MG    | MG, SE | <i>P</i> value,<br>WT/WTG | <i>P</i> value,<br>WT/M | <i>P</i> value,<br>WTG/MG | <i>P</i> value,<br>M/MG |
|---------------------------------------|-------|--------|-------|--------|-------|-------|-------|--------|---------------------------|-------------------------|---------------------------|-------------------------|
| 1-Pyrroline-3-hydroxy-5-carbonic acid | 3.300 | 0.681  | 3.573 | 0.301  | 3.241 | 0.299 | 3.457 | 0.558  | 0.361                     | 0.469                   | 0.429                     | 0.371                   |
| Alanine                               | 0.263 | 0.070  | 0.396 | 0.040  | 0.244 | 0.024 | 0.228 | 0.057  | 0.063                     | 0.403                   | 0.017                     | 0.398                   |
| β-Alanine                             | 0.138 | 0.028  | 0.145 | 0.012  | 0.141 | 0.014 | 0.153 | 0.024  | 0.415                     | 0.466                   | 0.385                     | 0.336                   |
| Alanyl-alanine                        | 0.599 | 0.089  | 0.575 | 0.142  | 0.519 | 0.064 | 0.598 | 0.133  | 0.445                     | 0.238                   | 0.454                     | 0.303                   |
| Asparagine                            | 0.209 | 0.050  | 0.257 | 0.029  | 0.194 | 0.031 | 0.193 | 0.047  | 0.211                     | 0.402                   | 0.139                     | 0.496                   |
| Aspartic acid                         | 0.128 | 0.028  | 0.131 | 0.009  | 0.169 | 0.016 | 0.199 | 0.031  | 0.456                     | 0.116                   | 0.037                     | 0.208                   |
| Benzoic acid                          | 0.038 | 0.005  | 0.052 | 0.008  | 0.041 | 0.004 | 0.035 | 0.004  | 0.077                     | 0.340                   | 0.044                     | 0.202                   |
| β-D-allose                            | 0.000 | 0.000  | 0.000 | 0.000  | 0.000 | 0.000 | 0.000 | 0.000  | 0.190                     | 0.074                   | 0.295                     | 0.398                   |
| 4-Aminobutanoic acid                  | 0.170 | 0.037  | 0.176 | 0.013  | 0.146 | 0.018 | 0.163 | 0.020  | 0.443                     | 0.285                   | 0.295                     | 0.275                   |
| Cellobiose                            | 0.000 | 0.000  | 0.027 | 0.027  | 0.000 | 0.000 | 0.000 | 0.000  | 0.174                     | 0.413                   | 0.174                     | 0.408                   |
| D230150                               | 0.039 | 0.013  | 0.027 | 0.010  | 0.025 | 0.007 | 0.025 | 0.005  | 0.234                     | 0.188                   | 0.445                     | 0.494                   |
| Ethanolamine                          | 0.417 | 0.143  | 0.250 | 0.053  | 0.268 | 0.043 | 0.316 | 0.023  | 0.151                     | 0.174                   | 0.140                     | 0.174                   |
| Fumaric acid                          | 0.037 | 0.008  | 0.036 | 0.004  | 0.039 | 0.006 | 0.039 | 0.006  | 0.487                     | 0.419                   | 0.350                     | 0.484                   |
| Galactaric acid                       | 0.000 | 0.000  | 0.000 | 0.000  | 0.000 | 0.000 | 0.000 | 0.000  | 0.425                     | 0.119                   | 0.260                     | 0.294                   |
| Glycine                               | 1.170 | 0.234  | 1.198 | 0.110  | 1.194 | 0.100 | 1.148 | 0.194  | 0.457                     | 0.463                   | 0.414                     | 0.419                   |
| 2-Phenylglycine                       | 0.000 | 0.000  | 0.000 | 0.000  | 0.000 | 0.000 | 0.000 | 0.000  | 0.068                     | 0.391                   | 0.415                     | 0.129                   |
| Hexadecanoic acid                     | 0.791 | 0.117  | 0.870 | 0.076  | 0.879 | 0.088 | 0.854 | 0.093  | 0.290                     | 0.279                   | 0.446                     | 0.424                   |
| Hydroxylamine                         | 0.073 | 0.014  | 0.081 | 0.007  | 0.094 | 0.011 | 0.078 | 0.007  | 0.312                     | 0.124                   | 0.399                     | 0.119                   |
| Idose                                 | 0.105 | 0.043  | 0.094 | 0.013  | 0.112 | 0.020 | 0.136 | 0.014  | 0.406                     | 0.447                   | 0.025                     | 0.171                   |
| Myo-inositol                          | 3.673 | 0.702  | 3.646 | 0.290  | 3.666 | 0.368 | 3.875 | 0.500  | 0.486                     | 0.497                   | 0.350                     | 0.371                   |
| Isoleucine                            | 0.232 | 0.056  | 0.240 | 0.027  | 0.215 | 0.026 | 0.229 | 0.048  | 0.449                     | 0.398                   | 0.424                     | 0.404                   |
| Leucine                               | 0.131 | 0.032  | 0.120 | 0.015  | 0.130 | 0.014 | 0.147 | 0.029  | 0.377                     | 0.486                   | 0.208                     | 0.300                   |
| Lysine                                | 0.000 | 0.000  | 0.000 | 0.000  | 0.000 | 0.000 | 0.000 | 0.000  | 0.409                     | 0.319                   | 0.114                     | 0.229                   |

| Metabolite                                                 | WT    | WT, SE | WTG   | WTG,SE | M     | M, SE | MG    | MG, SE | P value,<br>WT/WTG | P value,<br>WT/M | P value,<br>WTG/MG | P value,<br>M/MG |
|------------------------------------------------------------|-------|--------|-------|--------|-------|-------|-------|--------|--------------------|------------------|--------------------|------------------|
| Lyxose                                                     | 0.120 | 0.049  | 0.091 | 0.034  | 0.072 | 0.017 | 0.082 | 0.013  | 0.320              | 0.191            | 0.406              | 0.321            |
| Malic acid                                                 | 0.020 | 0.004  | 0.020 | 0.001  | 0.018 | 0.003 | 0.023 | 0.003  | 0.496              | 0.341            | 0.202              | 0.131            |
| NA_aldehyde(C9H18O)                                        | 0.628 | 0.121  | 0.691 | 0.090  | 0.762 | 0.109 | 0.920 | 0.171  | 0.341              | 0.212            | 0.133              | 0.227            |
| NA_benzyl ester                                            | 1.244 | 0.300  | 1.447 | 0.268  | 1.064 | 0.140 | 1.111 | 0.372  | 0.311              | 0.299            | 0.239              | 0.455            |
| NA114002                                                   | 0.763 | 0.153  | 0.907 | 0.119  | 0.777 | 0.090 | 0.639 | 0.185  | 0.236              | 0.470            | 0.125              | 0.260            |
| Octadecanoic acid                                          | 1.099 | 0.180  | 1.096 | 0.072  | 1.182 | 0.137 | 1.054 | 0.117  | 0.493              | 0.360            | 0.385              | 0.247            |
| Ornithine                                                  | 0.000 | 0.000  | 0.001 | 0.000  | 0.001 | 0.000 | 0.001 | 0.000  | 0.271              | 0.132            | 0.257              | 0.413            |
| Phenylalanine                                              | 0.172 | 0.043  | 0.188 | 0.025  | 0.160 | 0.021 | 0.165 | 0.033  | 0.380              | 0.405            | 0.295              | 0.456            |
| Phosphoric acid                                            | 2.666 | 0.361  | 3.128 | 0.270  | 3.080 | 0.322 | 3.575 | 0.489  | 0.162              | 0.203            | 0.222              | 0.209            |
| Proline                                                    | 0.079 | 0.014  | 0.087 | 0.022  | 0.112 | 0.018 | 0.154 | 0.032  | 0.374              | 0.084            | 0.059              | 0.144            |
| <b>Carboxy-proline</b>                                     | 0.002 | 0.001  | 0.001 | 0.001  | 0.000 | 0.000 | 0.000 | 0.000  | 0.209              | 0.093            | 0.180              | <b>0.050</b>     |
| 4-Hydroxyproline                                           | 0.161 | 0.024  | 0.166 | 0.010  | 0.127 | 0.012 | 0.124 | 0.012  | 0.420              | 0.118            | <b>0.008</b>       | 0.425            |
| Psicose                                                    | 1.771 | 0.711  | 1.114 | 0.105  | 2.442 | 0.559 | 2.115 | 0.356  | 0.195              | 0.235            | <b>0.015</b>       | 0.315            |
| Ribose                                                     | 0.310 | 0.088  | 0.260 | 0.018  | 0.386 | 0.057 | 0.387 | 0.057  | 0.296              | 0.242            | <b>0.035</b>       | 0.491            |
| Serine                                                     | 0.142 | 0.027  | 0.143 | 0.010  | 0.163 | 0.015 | 0.168 | 0.025  | 0.486              | 0.251            | 0.189              | 0.434            |
| Similar to 2,3-dihydropropyl ester<br>of octadecanoic acid | 3.152 | 0.502  | 3.211 | 0.217  | 3.937 | 0.646 | 3.278 | 0.415  | 0.459              | 0.177            | 0.445              | 0.204            |
| Sinapic acid                                               | 0.041 | 0.008  | 0.043 | 0.005  | 0.044 | 0.007 | 0.056 | 0.009  | 0.411              | 0.370            | 0.116              | 0.174            |
| Sucrose                                                    | 3.115 | 0.689  | 3.387 | 0.395  | 3.318 | 0.468 | 4.063 | 0.683  | 0.369              | 0.406            | 0.206              | 0.194            |
| Allo-threonine                                             | 0.291 | 0.062  | 0.308 | 0.031  | 0.305 | 0.033 | 0.328 | 0.061  | 0.405              | 0.427            | 0.391              | 0.373            |
| Tyrosine                                                   | 0.131 | 0.043  | 0.240 | 0.109  | 0.102 | 0.011 | 0.098 | 0.014  | 0.188              | 0.263            | 0.118              | 0.415            |
| Valine                                                     | 0.276 | 0.064  | 0.222 | 0.047  | 0.260 | 0.028 | 0.225 | 0.041  | 0.255              | 0.412            | 0.481              | 0.251            |
