# Supplementary material for: Sucrose and Mannans Affect Arabidopsis Shoot Gravitropism at the Cell Wall Level
Source: MDPI journal article supplement (doi:10.3390/plants13020209), 2024-01-11
Supplement: s1 [file s1]

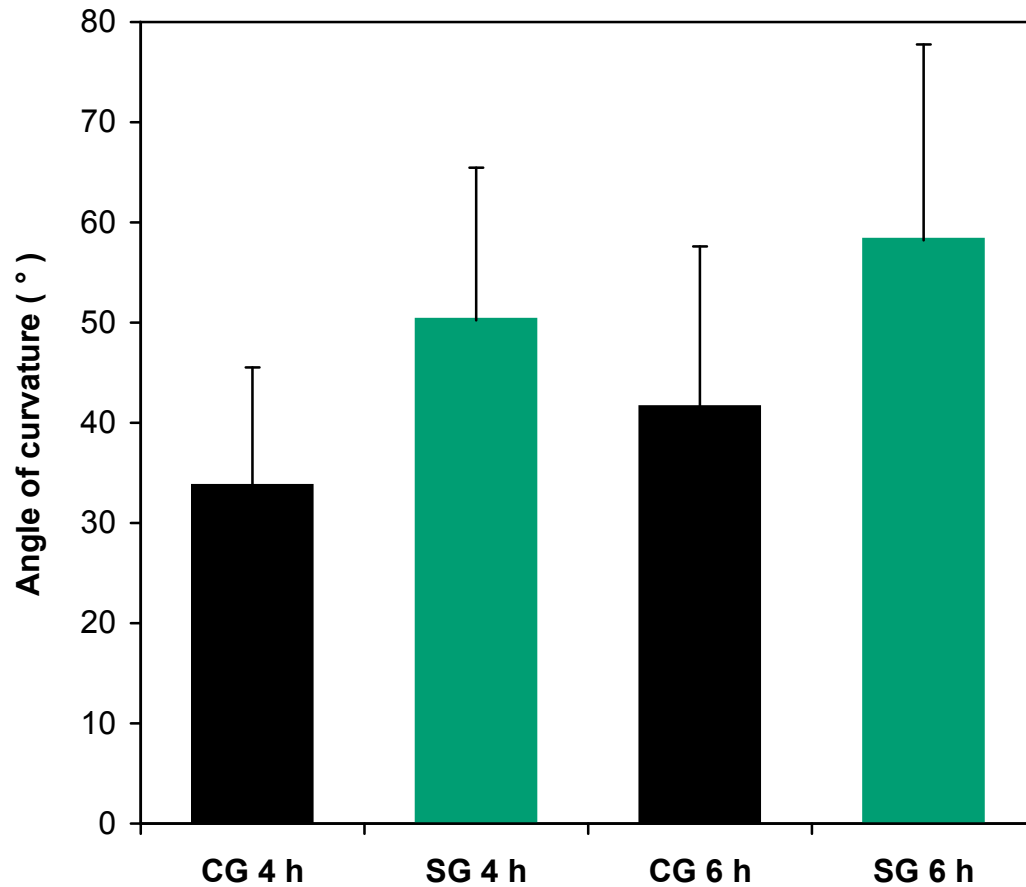

**Figure S1.** Sucrose increases the gravitropic bending of hypocotyls in *Arabidopsis* plants. Three-day-old etiolated Col-0 seedlings grown on vertical Petri plates without sucrose or in the presence of sucrose (1% w/v) were gravistimulated by a 90° counterclockwise rotation of the plates. Angles of their hypocotyl curvature were measured 4 h and 6 h after the moment of gravistimulation. Abbreviations: CG - gravistimulated plants grown without sucrose; SG - gravistimulated plants grown in the presence of sucrose. Data are means  $\pm$  SD (n=80). Sucrose significantly ( $P < 0.0001$ , Student's *t*-test) increased the angle of hypocotyl bending 4 h and 6 h after gravistimulation.
